# Supplementary material
Source: publisher site journal article supplement (https://www.dovepress.com/get_supplementary_file.php?f=272665.docx)
Supplement: Supplementary file 1 [file get_supplementary_file.php]

**Supplementary Table a.** Monthly (or more) utilization of OERs among survey respondents

| **OER** | **Residents (n=146)** | | **Attendings (n=102)** | | **P value** |
| --- | --- | --- | --- | --- | --- |
|  | n | (%) | n | (%) |  |
| Wikis | 134 | 91.8 | 47 | 46.1 | ***< 0.01*** |
| E-books | 132 | 90.4 | 56 | 54.9 | ***< 0.01*** |
| Sub_books | 36 | 24.7 | 30 | 29.4 | 0.49 |
| File Sharing Sites | 123 | 84.2 | 54 | 52.9 | ***< 0.01*** |
| Podcasts | 15 | 10.3 | 16 | 15.7 | 0.28 |
| Medical Blogs | 58 | 39.7 | 36 | 35.3 | 0.57 |
| Vodcasts | 114 | 78.1 | 60 | 58.8 | ***< 0.01*** |

**Supplementary Table b.** Reasons for use of mobile devices among survey respondents

| **Reason for usage** | **Residents (n=146)** | | **Attendings (n=102)** | | **P value** |
| --- | --- | --- | --- | --- | --- |
|  | n | (%) | n | (%) |  |
| Basic knowledge (e.g. studying) | 123 | 84.2 | 66 | 64.7 | **< 0.01** |
| Procedural skills (e.g. examination techniques, surgical skills) | 101 | 69.2 | 59 | 57.8 | 0.09 |
| Diagnostics (e.g. interpretation of images) | 99 | 67.8 | 53 | 52.0 | **0.02** |
| Answering clinical questions on demand | 127 | 87.0 | 67 | 65.7 | **< 0.01** |
| Looking up controversial issues | 104 | 71.2 | 79 | 77.5 | 0.34 |
| Connecting with peers | 109 | 74.7 | 74 | 72.5 | 0.82 |
| Connecting with educators | 82 | 56.2 | 45 | 44.1 | 0.08 |
| Connecting with patients | 51 | 34.9 | 60 | 58.8 | **< 0.01** |
